# Supplementary material for: Insights into the binding mode of MEK type-III inhibitors. A step towards discovering and designing allosteric kinase inhibitors across the human kinome
Source: PubMed Central journal article supplement (PMC5476283; doi:10.1371/journal.pone.0179936), 2017-06-19
Supplement: pone.0179936.s004.pdf [file pone.0179936.s004.pdf]

**S1 Table.**

| <b>PDB ID</b> | <b>Ligand Name</b> | <b>IC50 (nM)</b> |
|---------------|--------------------|------------------|
| 3DV3          | MEK                | 21               |
| 4MNE          | 573                | 35               |
| 4ARK          | M3K                | 61*              |
| 4ANB          | YQY                | 6.2              |
| 4AN9          | 2P7                | 44               |
| 4AN2          | EUI                | 0.9              |
| 4AN3          | 5Y0                | 0.6*             |
| 3V01          | 3V0                | 25               |
| 3PP1          | IZG                | 3.2              |
| 3OS3          | 3OS                | 235*             |
| 3ORN          | 3OR                | 8.8              |
| 3MBL          | LSG                | 18.0             |
| 3EQH          | 5BM                | 60.0             |
| 3EQG          | 4BM                | 5.2              |
| 3E8N          | VRA                | 19.0**           |
| 3DY7          | 1CX                | 2.0              |
| 3V04          | V04                | 13.0             |
| 3VVH          | 4BM                | 5.2              |
| 4LMN          | EUI                | 0.9              |

\* Data from PDBbind; \*\* data from Binding MOAD; remaining data from bindingDB.
